# Supplementary material
Source: HighWire-hosted journal article supplement (https://jnm.snmjournals.org/highwire/filestream/95286/field_highwire_adjunct_files/0/203570_Supplemental_Data.pdf)

**Supplemental Figure 1.** Reviewed publications reporting PSMA expression in neoplastic non-prostate cancer samples. (Last reviewed December 6, 2017).

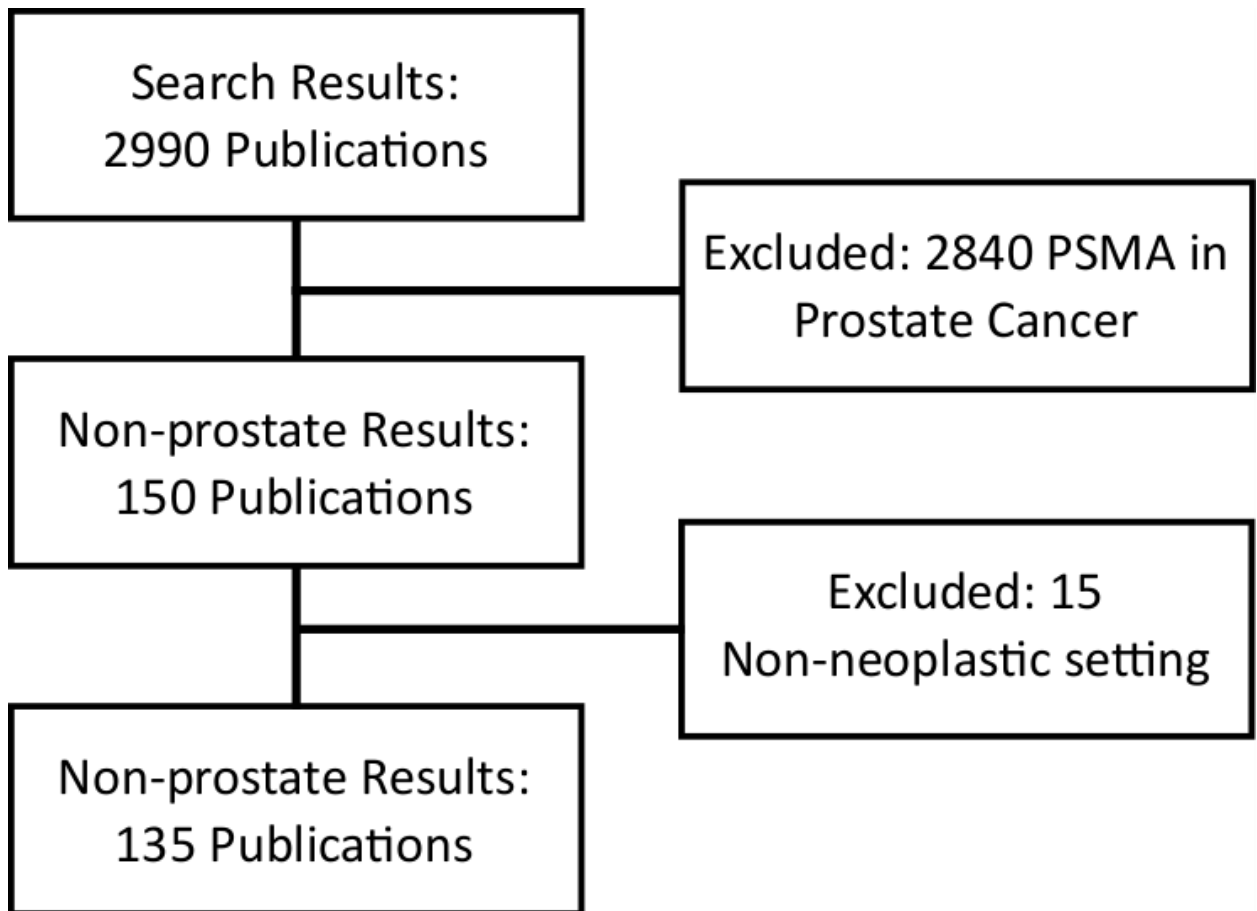

Supplement: 203570_Supplemental_Data.pdf [file 203570_Supplemental_Data.pdf]
